# Supplementary material for: Third-Generation Antipsychotics and Lurasidone in the Treatment of Substance-Induced Psychoses: A Narrative Review
Source: MDPI journal article supplement (doi:10.3390/healthcare12030339), 2024-01-29
Supplement: s1 [file s1]

**Table S5. Characteristics of antipsychotic drugs resulted to be used in Substance Induced Psychosis.**

| ANTIPSYCHOTIC DRUG    | MECHANISM OF ACTION                                                                                                                                                                                                                                                                                                      | THERAPEUTIC REGIMEN                                                        | CURRENT EVIDENCE                                                                                                         | SIDE EFFECTS                                                                                                                                                           |
|-----------------------|--------------------------------------------------------------------------------------------------------------------------------------------------------------------------------------------------------------------------------------------------------------------------------------------------------------------------|----------------------------------------------------------------------------|--------------------------------------------------------------------------------------------------------------------------|------------------------------------------------------------------------------------------------------------------------------------------------------------------------|
| <b>Aripiprazole</b>   | Partial agonism at dopamine D2 and serotonin 5-HT <sub>1A</sub> receptors; Antagonism at serotonin 5-HT <sub>2A</sub> receptors; Blockade of serotonin type 5-HT <sub>2C</sub> and 7 receptors                                                                                                                           | Orally: 15-30 mg/day; available as a depot formulation (400 mg fl/28 days) | Significant improvement in positive and negative symptoms, reduction in substance use and craving (cocaine and cannabis) | Better safety profile than other AP in terms of extrapyramidal side effects, sedation, and metabolic changes. Akathisia and agitation are reported (Wang et al., 2016) |
| <b>Cariprazine</b>    | Partial agonist at the dopamine (DA) D <sub>2</sub> and D <sub>3</sub> receptors and serotonin 5-HT <sub>1A</sub> receptors, and as an antagonist at the 5-HT <sub>2B</sub> receptors.                                                                                                                                   | Orally: 1.5-3 mg/day;                                                      | Improvement in substance induced psychosis (psychostimulant, cocaine and methamphetamine)                                | Good safety profile. No reported side effects. Only insomnia treated with benzodiazepines (Ricci et al., 2022)                                                         |
| <b>Brexipiprazole</b> | Partial agonism of 5-HT <sub>1A</sub> and D <sub>2</sub> receptors and antagonism of 5-HT <sub>2A</sub> . Brexpiprazole binds with high affinity to numerous monoaminergic receptors encompassing D <sub>2</sub> , D <sub>3</sub> , 5-HT <sub>1A</sub> , 5-HT <sub>2A</sub> , 5-HT <sub>2B</sub> , and 5-HT <sub>7</sub> | Orally: 2-4 mg/day;                                                        | Improvement cannabis withdrawal psychosis. modulator of dopamine-dependent behaviors during opioid use in rats           | Good safety profile. No reported side effects.                                                                                                                         |
| <b>Lurasidone</b>     | Full antagonist at dopamine D <sub>2</sub> and serotonin 5-HT <sub>2A</sub> and 5-HT <sub>7</sub> receptors                                                                                                                                                                                                              | Orally: 40-160 mg/day;                                                     | Improvement in cannabis induced psychotic symptoms and LSD                                                               | Good safety profile. Only sedation reported (Ricci et al., 2022)                                                                                                       |
