# Supplementary material for: Third-Generation Antipsychotics and Lurasidone in the Treatment of Substance-Induced Psychoses: A Narrative Review
Source: MDPI journal article supplement (doi:10.3390/healthcare12030339), 2024-01-29
Supplement: s1 [file s1]

**TABLE S6.** Receptor-binding profile. Antagonism and inverse agonism are indicated by neutral color whereas partial agonism by yellow. The number of crosses is correlated to binding affinity. 100 < Ki < 1000: + weak association. 10 < Ki < 100: ++ moderate association. 1 < Ki < 10: +++ strong association. 1 > Ki: ++++ very strong association.

|                     | D <sub>1</sub> | D <sub>2</sub> | D <sub>3</sub> | D <sub>4</sub> | H <sub>1</sub> | H <sub>2</sub> | H <sub>3</sub> | 5-HT <sub>1A</sub> | 5-HT <sub>1B</sub> | 5-HT <sub>2A</sub> | 5HT <sub>2B</sub> | 5-HT <sub>2C</sub> | 5-HT <sub>6</sub> | 5-HT <sub>7</sub> | M <sub>1</sub> | M <sub>3</sub> | α <sub>1</sub> | α <sub>2a</sub> | α <sub>2b</sub> | α <sub>2c</sub> |
|---------------------|----------------|----------------|----------------|----------------|----------------|----------------|----------------|--------------------|--------------------|--------------------|-------------------|--------------------|-------------------|-------------------|----------------|----------------|----------------|-----------------|-----------------|-----------------|
| <b>ARIPIRAZOLE</b>  |                | +++            | +++            | +              | ++             |                |                | +++                | +                  | ++                 | ++++              | ++                 | +                 | ++                |                |                | ++             | ++              | ++              | ++              |
| <b>LURASIDONE</b>   | +              | +++            |                |                |                |                |                | +++                |                    | +++                |                   | +                  |                   | ++++              |                |                | ++             | ++              |                 | +++             |
| <b>BREXPIRAZOLE</b> | +              | ++++           | +++            | +++            | ++             |                |                | ++++               | ++                 | ++++               | +++               | +                  | ++                | +++               |                |                | +++            | ++              | ++              | ++++            |
| <b>CARIPRAZINE</b>  |                | ++++           | ++++           |                | ++             |                |                | +++                |                    | ++                 | ++++              | +                  |                   | +                 |                |                | +              |                 |                 |                 |
