# Supplementary material for: Third-Generation Antipsychotics and Lurasidone in the Treatment of Substance-Induced Psychoses: A Narrative Review
Source: MDPI journal article supplement (doi:10.3390/healthcare12030339), 2024-01-29
Supplement: s1 [file s1]

**Table S2. MAIN FINDINGS OF RETRIEVED STUDIES IN CARIPRAZINE.**

| REFS                               | PSYCHIATRIC DIAGNOSIS                                      | KEY CONCEPT                                                                                                                                                    | POPULATION | SUBSTANCE-RELATED DIAGNOSIS          | SAMPLE | RESULTS                                                                                                                                                                                   |
|------------------------------------|------------------------------------------------------------|----------------------------------------------------------------------------------------------------------------------------------------------------------------|------------|--------------------------------------|--------|-------------------------------------------------------------------------------------------------------------------------------------------------------------------------------------------|
| <b>Roman et al., 2013</b>          | nd                                                         | Cariprazine, aripiprazole, and bifeprunox show potential in reducing cocaine reward and preventing relapse in cocaine addiction                                | nd         | Psychostimulants                     | Animal | Cariprazine (0.03–1 mg/kg) demonstrates anti-abuse potential in rats                                                                                                                      |
| <b>Jordan et al., 2020</b>         | nd                                                         | Positive role of cariprazine in cocaine reward in rodents                                                                                                      | nd         | Cocaine                              | Animal | Cariprazine (1-5mg·kg <sup>-1</sup> ) attenuates cocaine reward and relapse in rodents.                                                                                                   |
| <b>Rodriguez Cruz et al., 2021</b> | Schizophrenia in polysubstance abuser                      | Switching from Haloperidol to Cariprazine significantly improved symptoms and reduced substance abuse in a schizophrenia patient with a history of drug abuse. | 1          | Polysubstances                       | Human  | Cariprazine (4.5 mg/die) ameliorates positive, negative, and cognitive symptoms in a schizophrenic patient with an extensive history of substance abuse                                   |
| <b>Ricci et al., 2022</b>          | Methamphetamine induced psychosis                          | Cariprazine effectively reduced psychotic and addictive symptoms in a methamphetamine-induced psychosis case, indicating its potential therapeutic value       | 1          | Methamphetamine                      | Human  | Potential effect of cariprazine (4.5 mg/die) on a drug naïve patient with persistent psychotic symptoms induced by methamphetamine for the first time.                                    |
| <b>Truong et al., 2022</b>         | Methamphetamine induced psychosis                          | Cariprazine effectively reduced cravings and use in methamphetamine use disorder, indicating its potential as a novel treatment.                               | 2          | Methamphetamine                      | Human  | Cariprazine (1.5mg/die-3 mg /die) showed global functional improvement and reduction in methamphetamine cravings                                                                          |
| <b>Montes et al., 2021</b>         | Psychosis in methamphetamine, mephedrone and cocaine abuse | Cariprazine is efficacy in polysubstance-induced psychosis                                                                                                     | 1          | Cocaine, Mephedrone, Methamphetamine | Human  | Cariprazine (3 mg/die) effectively alleviated positive symptoms in a 31-year-old male who was HIV positive and had a history of abusing methamphetamine, mephedrone, cocaine, and alcohol |
| <b>Gentile et al., 2022</b>        | Cannabis induced psychosis                                 | Cariprazine shows positive effects in treating co-morbid psychosis and cannabis intake                                                                         | 1          | Cannabis                             | Human  | Administration of cariprazine (3 mg/die) led to an improvement in both negative and positive symptoms and resulted in a reduction in cannabinoid intake.                                  |
