# Supplementary material for: Third-Generation Antipsychotics and Lurasidone in the Treatment of Substance-Induced Psychoses: A Narrative Review
Source: MDPI journal article supplement (doi:10.3390/healthcare12030339), 2024-01-29
Supplement: s1 [file s1]

**Table S3. MAIN FINDINGS OF RETRIEVED STUDIES IN BREXPIRAZOLE.**

| REFS                        | PSYCHIATRIC<br>DIAGNOSIS             | KEY CONCEPT                                                               | POPULATION | SUBSTANCE<br>RELATED<br>DIAGNOSIS | SAMPLE | RESULTS                                                                                                                          |
|-----------------------------|--------------------------------------|---------------------------------------------------------------------------|------------|-----------------------------------|--------|----------------------------------------------------------------------------------------------------------------------------------|
| <b>Nickols et al., 2023</b> | nd                                   | Brexiprazole as a Dopamine Partial Agonist in Opioid Dependence Treatment | nd         | Opioids                           | Animal | Brexiprazole (0.5 mg/kg) is modulator of dopamine-dependent behaviors during opioid use and withdrawal                           |
| <b>Kung et al., 2022</b>    | Psychosis during cannabis withdrawal | Efficacy of brexpiprazole in cannabis withdrawal-induced psychosis        | 1          | Cannabis                          | Human  | Brexiprazole is effective in treating psychosis during cannabis withdrawal in a 25-year-old individual at a daily dosage of 3 mg |
